# Supplementary material
Source: publisher site journal article supplement (https://jor.pensoft.net/article/19945/download/suppl/33/)
Supplement: Supplementary file 1

## Sheet: Sheet1
		PERIOD	SITE	TRT	COTE	PSDE	TRPA	AGDE	MEFL	ARPS	TRCA	AMCO	HYAL	MELA	TRFO	PAPA	HICA	LEWH	CAOL	LIPL	ACPI	PHRO	MEAR	BOAR	LAAZ	ERSI	TRKI	MEAZ	OPOB	SYMO	BRMA	CIPA	DABI	XACO	MEOC	AUFE	HATR	MEGL	HEVI	PSTE	MEBO	ACMA	TRGY	METE	PHQU	ARCO	AUEL	COOC	HERU
		F92	BA	G	2	2	2	3	18	0	0	0	0	0	0	0	0	0	0	0	0	0	0	0	0	0	0	0	0	0	0	0	0	0	0	0	0	0	0	0	0	0	0	0	0	0	0	0	0
		F92	BA	U	3	2	3	1	23	1	1	2	2	2	5	6	0	0	0	0	0	0	0	0	0	0	0	0	0	0	0	0	0	0	0	0	0	0	0	0	0	0	0	0	0	0	0	0	0
		F92	JR	G	0	9	6	0	0	0	4	0	0	0	0	0	1	1	2	2	3	4	9	64	0	0	0	0	0	0	0	0	0	0	0	0	0	0	0	0	0	0	0	0	0	0	0	0	0
		F92	JR	U	0	6	6	0	0	0	10	0	0	1	0	10	2	2	5	2	2	2	6	37	7	0	0	0	0	0	0	0	0	0	0	0	0	0	0	0	0	0	0	0	0	0	0	0	0
		F92	OM	G	0	0	7	14	0	0	0	0	0	0	0	1	0	0	0	1	0	0	2	4	0	11	15	0	0	0	0	0	0	0	0	0	0	0	0	0	0	0	0	0	0	0	0	0	0
		F92	OM	U	0	0	0	19	0	4	0	0	0	0	0	15	0	0	0	1	0	0	1	0	0	63	1	1	2	4	0	0	0	0	0	0	0	0	0	0	0	0	0	0	0	0	0	0	0
		F92	SE	G	0	12	13	0	0	1	0	0	0	0	0	0	0	0	0	0	0	0	0	0	0	0	1	4	0	0	1	1	2	4	6	14	0	0	0	0	0	0	0	0	0	0	0	0	0
		F92	SE	U	0	18	5	3	0	4	0	0	0	2	2	11	0	0	0	0	0	0	0	0	0	1	5	35	1	1	1	0	1	3	16	12	3	12	0	0	0	0	0	0	0	0	0	0	0
		F93	BA	G	2	1	14	4	14	0	0	0	1	0	0	3	0	0	0	0	0	0	0	0	0	9	0	3	0	0	0	0	0	0	0	1	0	0	0	0	0	0	0	0	0	0	0	0	0
		F93	BA	U	2	0	3	1	29	2	0	0	11	0	1	20	0	0	0	0	0	0	1	0	0	18	0	1	0	0	0	0	2	0	0	1	0	0	1	0	0	0	0	0	0	0	0	0	0
		F93	JR	G	0	0	23	0	0	0	24	0	0	0	0	5	5	0	0	0	2	0	7	62	8	0	0	0	0	0	0	9	0	0	0	0	0	0	0	0	0	0	0	0	0	0	0	0	0
		F93	JR	U	0	2	33	0	0	0	17	0	0	0	0	15	11	2	1	1	7	4	6	34	16	0	0	0	0	0	0	12	0	0	0	0	0	0	0	2	0	0	0	0	0	0	0	0	0
		F93	OM	G	0	0	14	35	0	1	0	0	0	0	0	14	0	0	0	0	0	0	2	1	0	68	3	0	3	0	0	0	0	0	0	4	0	1	8	0	0	0	0	0	0	0	0	0	0
		F93	OM	U	0	0	3	11	0	9	0	9	1	0	0	89	0	0	0	0	0	0	7	0	0	150	8	5	21	2	1	0	0	0	0	3	0	5	2	0	0	0	0	0	0	0	0	0	0
		F93	PH	G	0	0	20	5	0	0	4	0	0	0	0	36	0	0	0	0	2	0	5	18	0	7	0	1	0	0	0	8	0	0	0	0	0	0	0	0	3	6	10	0	0	0	0	0	0
		F93	PH	U	0	0	19	0	0	0	0	0	0	0	0	17	0	0	0	0	0	0	2	27	0	5	0	1	0	0	0	5	0	0	0	0	0	0	0	0	0	5	11	1	0	0	0	0	0
		F93	SE	G	0	60	39	10	0	1	0	0	0	0	0	1	0	0	0	0	0	0	0	0	0	0	1	10	0	0	0	0	0	2	0	6	0	8	0	0	0	0	0	0	0	0	0	0	0
		F93	SE	U	0	63	29	7	0	10	0	4	0	11	0	39	0	0	0	0	0	0	0	0	0	7	3	1	0	0	1	0	0	2	7	10	2	27	0	0	0	0	0	0	3	0	0	0	0
		F94	BA	G	0	0	3	0	3	0	0	0	0	0	0	0	0	0	0	0	0	0	0	0	0	0	0	0	0	0	0	0	0	0	0	0	0	0	0	0	0	0	0	0	0	0	0	0	0
		F94	BA	U	1	0	2	2	8	0	0	2	0	0	1	7	0	0	0	0	0	0	0	0	0	3	0	0	0	0	0	0	0	0	0	0	0	0	1	0	0	0	0	0	0	0	0	0	0
		F94	JR	G	0	0	9	0	0	0	1	0	0	0	0	0	2	0	0	3	0	0	0	27	0	0	0	0	0	0	0	0	0	0	0	0	0	0	0	0	0	0	0	0	0	0	0	0	0
		F94	JR	U	0	0	10	0	0	0	4	0	0	0	0	0	2	0	0	5	2	0	0	16	2	0	0	0	0	0	0	1	0	0	0	0	0	0	0	0	0	0	0	0	0	0	0	0	0
		F94	OM	G	0	66	5	5	0	0	0	0	0	0	0	2	0	0	0	0	0	0	3	0	0	41	7	1	0	0	0	0	0	0	0	0	0	0	0	0	0	0	0	0	4	0	0	0	0
		F94	OM	U	0	49	1	4	1	3	0	0	0	0	0	51	0	0	0	0	0	0	3	0	0	186	2	0	2	0	0	0	1	0	0	1	0	0	0	0	0	0	0	0	2	1	0	0	0
		F94	PH	G	1	0	6	0	0	0	5	0	0	0	0	0	0	0	0	0	0	0	0	17	0	3	0	0	0	1	0	0	0	0	0	0	0	0	0	0	0	0	20	0	0	0	0	0	0
		F94	PH	U	1	0	11	0	0	0	3	0	0	0	0	0	0	0	0	0	0	0	2	7	0	6	0	0	1	0	0	0	0	0	0	0	0	0	0	0	0	0	15	0	0	0	0	0	0
		F94	SE	G	0	0	32	4	0	0	0	0	0	2	0	1	0	0	0	0	0	0	2	0	0	1	0	0	0	0	0	0	0	0	0	2	3	0	0	0	0	0	0	0	0	0	1	0	0
		F94	SE	U	0	30	31	21	0	3	0	3	0	7	0	30	0	1	0	0	0	0	5	0	0	30	0	3	1	0	0	0	0	2	0	5	3	4	0	0	0	0	0	0	0	1	0	19	0
		F95	BA	G	2	0	12	1	3	0	0	0	0	0	0	0	0	0	0	0	0	0	0	0	0	0	0	0	0	0	0	0	0	0	0	0	0	0	0	0	0	0	0	0	0	0	0	0	0
		F95	BA	U	3	0	7	5	7	0	0	0	3	0	2	35	0	0	0	0	0	0	0	0	0	19	0	0	0	0	0	0	0	0	0	0	0	0	0	0	0	0	0	0	0	0	0	0	0
		F95	JR	G	0	0	24	0	0	0	6	0	0	0	0	0	0	0	0	5	0	0	0	51	0	0	0	0	0	0	0	0	0	0	0	0	0	0	0	0	0	0	0	0	0	0	0	0	0
		F95	JR	U	0	0	31	0	0	0	15	0	0	0	0	0	0	0	0	8	3	0	0	48	0	0	0	0	0	0	0	0	0	0	0	0	0	0	0	0	0	0	0	0	0	0	0	0	0
		F95	OM	G	0	0	13	13	0	0	0	0	0	0	0	3	0	0	0	0	0	0	8	0	0	11	10	0	0	0	0	0	0	0	0	2	0	0	0	0	0	0	0	0	0	0	0	0	1
		F95	OM	U	0	0	5	14	0	3	0	2	0	0	0	40	0	0	0	1	0	0	7	0	0	40	5	0	0	2	0	0	0	1	0	5	0	0	0	0	0	0	0	0	0	0	0	0	1
		F95	PH	G	3	0	25	2	0	0	3	0	0	0	0	2	0	0	0	0	1	0	1	17	0	4	0	0	0	0	0	0	0	0	0	0	0	0	0	0	0	0	4	0	0	0	0	0	0
		F95	PH	U	4	0	18	2	0	0	5	0	0	0	0	0	0	0	0	0	0	0	0	27	0	0	0	0	0	1	0	0	0	0	0	0	0	0	0	0	0	0	13	0	0	0	0	0	0
		F95	SE	G	0	0	37	13	0	0	1	0	0	0	0	0	0	0	0	0	0	0	0	0	0	0	0	2	0	0	0	0	0	1	0	2	4	0	0	0	0	0	0	0	0	0	1	3	0
		F95	SE	U	0	0	22	17	0	2	0	3	0	0	1	30	0	0	0	0	0	0	0	0	0	40	0	2	0	0	0	0	0	0	0	6	8	0	0	0	0	0	0	0	0	0	1	5	1
		F96	BA	G	3	0	0	0	6	0	0	0	1	0	0	3	0	0	0	0	0	0	0	0	0	0	0	0	0	0	0	0	0	0	0	0	0	0	0	0	0	0	0	0	0	0	0	0	0
		F96	BA	U	3	0	0	0	10	0	0	0	1	0	2	38	0	0	0	0	0	0	0	0	0	2	0	0	0	0	0	0	0	0	0	0	0	0	0	0	0	0	0	0	0	0	0	0	0
		F96	JR	G	0	0	19	0	0	0	2	0	0	0	0	0	0	0	0	2	0	0	2	29	0	0	0	0	0	0	0	0	0	0	0	0	0	0	0	0	0	0	0	0	0	0	0	0	0
		F96	JR	U	0	0	20	0	0	0	3	0	0	0	0	5	0	0	0	4	0	1	0	23	1	4	0	0	0	0	0	0	0	0	0	0	0	0	0	0	0	0	0	0	0	0	0	0	0
		F96	OM	G	0	35	43	13	0	1	0	0	0	0	0	14	0	0	1	0	0	0	2	9	0	29	16	0	0	0	0	0	1	0	0	13	0	3	0	0	0	0	0	0	0	0	0	0	0
		F96	OM	U	0	28	15	14	0	9	0	0	0	0	1	69	0	0	3	0	0	0	1	5	0	67	6	0	0	0	1	0	1	0	0	14	3	8	0	0	0	0	0	0	1	0	0	0	0
		F96	PH	G	0	9	31	4	0	1	1	0	0	0	0	7	0	0	0	0	2	0	1	13	0	3	0	0	0	0	0	0	0	0	0	0	0	0	0	0	0	0	3	0	0	0	0	0	0
		F96	PH	U	0	6	37	5	0	1	3	0	0	0	0	5	0	0	0	0	0	0	1	15	0	1	0	0	0	0	0	0	0	0	0	0	0	0	0	0	0	0	4	0	0	0	0	0	0
		F96	SE	G	0	0	83	0	0	0	1	0	0	0	1	0	0	0	0	0	0	0	0	0	0	0	0	3	0	0	1	0	0	1	0	1	0	1	0	0	0	0	0	0	3	0	0	0	0
		F96	SE	U	0	0	61	2	0	3	2	0	0	0	3	40	0	0	0	0	0	0	0	0	0	10	0	3	0	1	3	0	1	0	0	8	0	10	0	0	0	0	0	0	1	0	0	0	0
		S92	BA	G	0	8	12	4	38	0	0	7	0	0	0	0	0	0	0	0	0	0	0	0	0	0	0	0	0	0	0	3	1	2	0	0	0	0	1	0	0	0	0	0	0	2	0	39	0
		S92	BA	U	0	6	15	4	39	0	0	0	0	0	0	3	0	0	0	0	0	0	0	0	0	1	0	0	0	0	0	0	0	3	0	0	0	0	0	0	0	0	0	0	0	2	0	29	0
		S92	JR	G	0	0	8	0	0	0	0	0	0	0	0	1	0	0	0	0	0	1	0	23	0	0	0	0	0	0	0	4	0	0	0	0	0	0	0	22	0	0	0	0	0	0	0	0	0
		S92	JR	U	0	0	12	0	0	0	0	0	0	0	0	11	0	0	0	0	0	1	0	26	1	0	0	0	0	0	0	6	0	0	0	0	0	0	0	37	0	0	0	0	0	0	0	0	0
		S92	LL	G	0	0	30	0	0	0	0	0	0	0	0	0	0	0	0	0	0	0	0	26	0	0	0	0	0	0	0	11	0	0	0	0	0	0	0	0	0	0	0	0	0	0	0	0	0
		S92	LL	U	0	0	13	0	0	0	0	0	0	0	0	0	0	0	0	0	0	0	0	17	0	0	0	0	0	0	0	8	0	0	0	0	0	0	0	0	0	0	0	0	0	0	0	0	0
		S92	OM	G	0	108	10	40	0	0	0	8	0	0	0	7	0	0	0	0	0	1	0	0	0	19	0	0	0	0	0	0	0	5	0	0	0	0	0	0	0	0	0	0	0	0	0	28	0
		S92	OM	U	0	56	2	8	0	0	0	16	0	0	0	28	0	0	0	0	0	0	0	0	0	174	0	0	0	0	0	0	0	0	0	0	0	0	0	0	0	0	0	0	0	11	0	6	0
		S92	SE	G	0	189	8	12	0	0	0	0	0	0	0	0	0	0	0	0	0	0	0	0	0	1	0	0	0	0	0	4	0	66	0	25	0	0	0	0	0	0	0	0	0	1	0	3	0
		S92	SE	U	0	156	5	7	0	0	0	0	0	0	0	20	0	0	0	0	1	0	0	0	0	43	0	0	0	0	0	1	0	36	0	13	1	0	0	0	0	0	0	0	0	2	0	9	1
		S93	BA	G	0	4	1	12	140	0	0	3	0	0	0	0	0	0	0	0	0	0	0	0	0	11	0	0	0	0	0	0	0	1	0	0	0	0	0	0	0	0	0	0	0	0	0	112	0
		S93	BA	U	0	2	2	11	216	0	0	4	0	0	0	7	0	0	0	0	0	0	0	0	0	16	0	0	0	0	0	0	0	0	0	0	0	0	0	2	0	0	0	0	0	1	0	114	0
		S93	JR	G	0	9	6	0	0	0	0	0	0	0	0	0	0	0	0	0	0	0	0	18	0	0	0	0	0	0	0	12	0	0	0	0	0	0	0	3	0	0	0	0	0	0	0	0	0
		S93	JR	U	0	3	7	0	0	0	0	0	0	0	0	0	0	0	0	0	0	4	0	12	0	0	0	0	0	0	0	15	0	0	0	0	0	0	0	11	0	0	0	0	0	0	0	0	0
		S93	OM	G	0	31	6	22	0	0	0	2	0	0	0	6	0	0	0	0	0	0	0	0	0	4	0	0	0	0	0	0	0	0	0	0	0	0	0	0	0	0	0	0	0	0	0	45	1
		S93	OM	U	0	9	4	16	0	0	0	10	0	0	0	109	0	0	0	0	0	0	0	0	0	69	0	0	0	0	0	0	0	0	0	0	0	0	0	0	0	0	0	0	0	3	0	20	0
		S93	PH	G	0	0	8	2	0	0	0	0	0	0	0	10	0	0	0	0	0	0	0	9	0	4	0	0	0	0	0	1	0	0	0	0	0	0	0	11	0	0	1	0	0	0	0	0	0
		S93	PH	U	0	3	6	3	0	0	0	0	0	0	0	7	0	0	0	0	0	0	0	8	0	2	0	0	0	0	0	0	0	0	0	0	0	0	0	15	0	0	2	0	0	0	0	0	0
		S93	SE	G	0	157	2	9	0	0	0	0	0	0	0	0	0	0	0	0	0	0	0	0	0	0	0	0	0	0	0	1	0	34	0	0	0	0	0	0	0	0	0	0	0	0	0	1	0
		S93	SE	U	0	121	2	16	0	0	0	0	0	0	0	0	0	0	0	0	0	0	0	0	0	12	0	0	0	0	0	0	0	18	0	0	0	0	0	0	0	0	0	0	0	3	0	31	0
		S94	BA	G	0	10	1	2	0	0	0	0	0	0	0	1	0	0	0	0	0	0	0	0	0	0	0	0	0	0	0	3	0	0	0	0	0	0	0	0	0	0	0	0	0	1	0	7	0
		S94	BA	U	0	18	2	8	7	0	0	3	0	0	0	3	0	0	0	0	0	0	0	0	0	17	0	0	0	0	0	1	0	0	0	0	0	0	0	0	0	0	0	0	0	0	0	30	0
		S94	JR	G	0	0	8	0	0	0	0	0	0	0	0	0	0	0	0	0	0	0	0	23	0	0	0	0	0	0	0	4	0	0	0	0	0	0	0	15	0	0	0	0	0	0	0	0	0
		S94	JR	U	0	0	10	1	0	0	0	0	0	0	0	1	0	0	0	0	0	1	0	18	0	0	0	0	0	0	0	7	0	0	0	0	0	0	0	25	0	0	0	0	0	0	0	0	0
		S94	OM	G	0	58	2	38	0	0	0	0	0	0	0	2	0	0	0	0	0	0	0	0	0	22	0	0	0	0	0	0	0	0	0	0	0	0	0	0	0	0	0	0	0	0	0	50	6
		S94	OM	U	0	41	1	42	0	0	0	4	0	0	0	123	0	0	0	0	0	0	0	0	0	164	0	0	0	0	0	0	0	0	0	0	0	0	0	0	0	0	0	0	0	6	0	22	5
		S94	PH	G	0	0	7	3	0	0	0	0	0	0	0	5	0	0	0	0	0	0	0	7	0	10	0	0	0	0	0	1	0	0	0	0	0	0	0	7	0	0	0	0	0	1	0	0	0
		S94	PH	U	0	0	13	4	0	0	0	1	0	0	0	6	0	0	0	0	0	0	0	5	0	3	0	0	0	0	0	1	0	0	0	0	0	0	0	9	0	0	0	0	0	1	0	1	0
		S94	SE	G	0	44	3	7	0	0	0	0	0	0	0	0	0	0	0	0	0	0	0	0	0	1	0	0	0	0	0	0	0	8	0	0	0	0	1	0	0	0	0	0	0	0	0	12	0
		S94	SE	U	0	54	5	20	0	0	0	1	0	0	0	21	0	0	0	0	0	0	0	0	0	19	0	0	0	0	0	1	0	2	0	0	0	0	0	0	0	0	0	0	0	2	0	49	0
		S95	BA	G	0	3	34	0	0	0	0	0	0	0	0	2	0	0	0	0	0	0	0	0	0	0	0	0	0	0	0	0	0	0	0	0	0	0	0	0	0	0	0	0	0	0	0	14	0
		S95	BA	U	0	7	22	0	2	0	0	0	0	0	0	22	0	0	0	0	0	0	0	0	0	16	0	0	0	0	0	0	1	0	0	0	0	0	0	0	0	0	0	0	0	2	0	30	0
		S95	JR	G	0	2	35	0	0	0	0	0	0	0	0	0	0	0	0	0	0	0	0	0	0	0	0	0	0	0	0	2	0	0	0	0	0	0	0	12	0	0	0	0	0	0	0	0	0
		S95	JR	U	0	0	34	0	0	0	0	0	0	0	0	0	0	0	0	0	0	1	0	0	0	0	0	0	0	0	0	6	0	0	0	0	0	0	0	19	0	0	0	0	0	0	0	0	0
		S95	OM	G	0	39	8	2	0	0	0	1	0	0	0	1	0	0	0	0	0	0	0	2	0	3	0	0	0	0	0	0	0	0	0	0	0	0	2	0	0	0	0	0	0	0	0	45	2
		S95	OM	U	0	27	1	3	0	0	0	2	0	0	0	32	0	0	0	0	0	0	0	0	0	54	0	0	0	0	0	0	0	0	0	0	0	0	1	0	0	0	0	0	0	9	0	50	0
		S95	PH	G	0	1	34	0	0	0	0	0	0	0	0	0	0	0	0	0	0	0	0	8	0	1	0	0	0	0	0	1	0	0	0	0	0	0	0	1	0	0	2	0	0	0	0	0	0
		S95	PH	U	0	0	35	0	0	0	0	0	0	0	0	0	0	0	0	0	0	0	0	8	0	1	0	0	0	0	0	2	0	0	0	0	0	0	0	0	0	0	5	0	0	1	0	0	0
		S95	SE	G	0	36	98	8	0	0	0	2	0	0	0	25	0	0	0	0	0	0	0	0	0	24	0	1	0	0	0	0	0	20	0	0	0	0	0	4	0	0	0	0	0	1	0	59	0
		S95	SE	U	0	30	36	5	0	0	0	2	0	0	0	24	0	0	0	0	0	0	0	0	0	25	0	2	0	0	0	0	0	6	0	0	0	0	0	1	0	0	0	0	0	2	0	32	0
		S96	BA	G	0	0	1	0	0	0	0	0	0	0	0	0	0	0	0	0	0	0	0	0	0	0	0	0	0	0	0	1	0	0	0	0	0	0	6	0	0	0	0	0	0	0	0	2	0
		S96	BA	U	0	2	0	0	0	0	0	0	0	0	0	0	0	0	0	0	0	0	0	0	0	0	0	0	0	0	0	0	0	0	0	0	0	0	13	0	0	0	0	0	0	1	0	5	0
		S96	JR	G	0	0	1	0	0	0	0	0	0	0	0	0	0	0	0	0	0	0	0	0	0	3	0	0	0	0	0	3	0	0	0	0	0	0	0	1	0	0	0	0	0	0	0	0	0
		S96	JR	U	0	0	2	0	0	0	0	0	0	0	0	0	0	0	0	0	0	0	0	0	0	2	0	0	0	0	0	2	0	0	0	0	0	0	0	1	0	0	0	0	0	0	0	0	0
		S96	OM	G	0	10	2	4	0	0	0	0	0	0	0	0	0	0	0	0	0	0	0	0	0	4	0	0	0	0	0	0	0	0	0	0	0	0	0	0	0	0	0	0	0	1	0	11	0
		S96	OM	U	0	15	1	10	0	0	0	0	0	0	0	0	0	0	0	0	0	0	0	0	0	31	0	0	0	0	0	0	0	0	0	0	0	0	0	0	0	0	0	0	0	8	0	17	0
		S96	PH	G	0	3	2	0	0	0	0	0	0	0	0	0	0	0	0	0	0	0	0	0	0	0	0	0	0	0	0	0	0	0	0	0	0	0	0	1	0	0	0	0	0	0	0	0	0
		S96	PH	U	0	1	2	0	0	0	0	0	0	0	0	0	0	0	0	0	0	0	0	0	0	0	0	0	0	0	0	0	0	0	0	0	0	0	0	1	0	0	0	0	0	1	0	0	0
		S96	SE	G	0	1	0	0	0	0	0	0	0	0	0	0	0	0	0	0	0	0	0	0	0	0	0	0	0	0	0	0	0	0	0	0	0	0	0	0	0	0	0	0	0	0	0	0	0
		S96	SE	U	0	4	0	0	0	1	0	0	0	0	0	0	0	0	0	0	0	0	0	0	0	0	0	0	0	0	0	0	0	0	0	0	0	0	0	0	0	0	0	0	0	1	0	0	0
[truncated: 5 more columns]

## Sheet: Sheet2
Table S3. Counts of each grasshopper species, each year, season, site and grazing treatment.
		1992																1993																				1994
		Bosque				Jornada				Otero				Sevilleta				Bosque				Jornada				Otero				Phillips				Sevilleta				Bosque				Jornada				Otero
		Spring 1992		Fall 1992		Spring 1992		Fall 1992		Spring 1992		Fall 1992		Spring 1992		Fall 1992		Spring 1993		Fall 1993		Spring 1993		Fall 1993		Spring 1993		Fall 1993		Spring 1993		Fall 1993		Spring 1993		Fall 1993		Spring 1994		Fall 1994		Spring 1994		Fall 1994		Spring 1994		Fall 1994
Grasshopper Species	Code	Grazed	Not Grazed	Grazed	Not Grazed	Grazed	Not Grazed	Grazed	Not Grazed	Grazed	Not Grazed	Grazed	Not Grazed	Grazed	Not Grazed	Grazed	Not Grazed	Grazed	Not Grazed	Grazed	Not Grazed	Grazed	Not Grazed	Grazed	Not Grazed	Grazed	Not Grazed	Grazed	Not Grazed	Grazed	Not Grazed	Grazed	Not Grazed	Grazed	Not Grazed	Grazed	Not Grazed	Grazed	Not Grazed	Grazed	Not Grazed	Grazed	Not Grazed	Grazed	Not Grazed	Grazed	Not Grazed	Grazed	Not Grazed
Acrolophitus hirtipes	ACHI	0	0	0	0	0	0	0	0	0	0	0	0	0	0	0	0	0	0	0	0	0	0	0	0	0	0	0	0	0	0	0	0	0	0	0	0	0	0	0	0	0	0	0	0	0	0	0	0
Acrolophitus maculipennis	ACMA	0	0	0	0	0	0	0	0	0	0	0	0	0	0	0	0	0	0	0	0	0	0	0	0	0	0	0	0	0	0	6	5	0	0	0	0	0	0	0	0	0	0	0	0	0	0	0	0
Acantherus piperatus	ACPI	0	0	0	0	0	0	3	2	0	0	0	0	0	1	0	0	0	0	0	0	0	0	2	7	0	0	0	0	0	0	2	0	0	0	0	0	0	0	0	0	0	0	0	2	0	0	0	0
Ageneotettix deorum	AGDE	4	4	3	1	0	0	0	0	40	8	14	19	12	7	0	3	12	11	4	1	0	0	0	0	22	16	35	11	2	3	5	0	9	16	10	7	2	8	0	2	0	1	0	0	38	42	5	4
Amphitornus coloradus	AMCO	7	0	0	2	0	0	0	0	8	16	0	0	0	0	0	0	3	4	0	0	0	0	0	0	2	10	0	9	0	0	0	0	0	0	0	4	0	3	0	2	0	0	0	0	0	4	0	0
Arphia conspersa	ARCO	2	2	0	0	0	0	0	0	0	11	0	0	1	2	0	0	0	1	0	0	0	0	0	0	0	3	0	0	0	0	0	0	0	3	0	0	1	0	0	0	0	0	0	0	0	6	0	1
Arphia pseudonietana	ARPS	0	0	0	1	0	0	0	0	0	0	0	4	0	0	1	4	0	0	0	2	0	0	0	0	0	0	1	9	0	0	0	0	0	0	1	10	0	0	0	0	0	0	0	0	0	0	0	3
Aulocara elliotti	AUEL	0	0	0	0	0	0	0	0	0	0	0	0	0	0	0	0	0	0	0	0	0	0	0	0	0	0	0	0	0	0	0	0	0	0	0	0	0	0	0	0	0	0	0	0	0	0	0	0
Aulocara femoratum	AUFE	0	0	0	0	0	0	0	0	0	0	0	0	25	13	14	12	0	0	1	1	0	0	0	0	0	0	4	3	0	0	0	0	0	0	6	10	0	0	0	0	0	0	0	0	0	0	0	1
Bootettix argentatus	BOAR	0	0	0	0	23	26	64	37	0	0	4	0	0	0	0	0	0	0	0	0	18	12	62	34	0	0	1	0	9	8	18	27	0	0	0	0	0	0	0	0	23	18	27	16	0	0	0	0
Brachystola magna	BRMA	0	0	0	0	0	0	0	0	0	0	0	0	0	0	1	1	0	0	0	0	0	0	0	0	0	0	0	1	0	0	0	0	0	0	0	1	0	0	0	0	0	0	0	0	0	0	0	0
Campylacantha olivacea	CAOL	0	0	0	0	0	0	2	5	0	0	0	0	0	0	0	0	0	0	0	0	0	0	0	1	0	0	0	0	0	0	0	0	0	0	0	0	0	0	0	0	0	0	0	0	0	0	0	0
Cibolacris parviceps	CIPA	3	0	0	0	4	6	0	0	0	0	0	0	4	1	1	0	0	0	0	0	12	15	9	12	0	0	0	0	1	0	8	5	1	0	0	0	3	1	0	0	4	7	0	1	0	0	0	0
Cordillacris crenulata	COCR	1	0	0	0	0	0	0	0	4	0	0	0	2	1	0	0	0	0	0	0	0	0	0	0	0	0	0	0	0	0	0	0	0	1	0	0	0	0	0	0	0	0	0	0	0	0	0	0
Cordillacris occipitalis	COOC	39	29	0	0	0	0	0	0	28	6	0	0	3	9	0	0	112	114	0	0	0	0	0	0	45	20	0	0	0	0	0	0	1	31	0	0	7	30	0	0	0	0	0	0	50	22	0	0
Conozoa texana	COTE	0	0	2	3	0	0	0	0	0	0	0	0	0	0	0	0	0	0	2	2	0	0	0	0	0	0	0	0	0	0	0	0	0	0	0	0	0	0	0	1	0	0	0	0	0	0	0	0
Dactylotum bicolor	DABI	1	0	0	0	0	0	0	0	0	0	0	0	0	0	2	1	0	0	0	2	0	0	0	0	0	0	0	0	0	0	0	0	0	0	0	0	0	0	0	0	0	0	0	0	0	0	0	1
Eritettix simplex	ERSI	0	1	0	0	0	0	0	0	19	174	11	63	1	43	0	1	11	16	9	18	0	0	0	0	4	69	68	150	4	2	7	5	0	12	0	7	0	17	0	3	0	0	0	0	22	164	41	186
Hadtrotettix trifasciatus	HATR	0	0	0	0	0	0	0	0	0	0	0	0	0	1	0	3	0	0	0	0	0	0	0	0	0	0	0	0	0	0	0	0	0	0	0	2	0	0	0	0	0	0	0	0	0	0	0	0
Heliaula rufa	HERU	0	0	0	0	0	0	0	0	0	0	0	0	0	1	0	0	0	0	0	0	0	0	0	0	1	0	0	0	0	0	0	0	0	0	0	0	0	0	0	0	0	0	0	0	6	5	0	0
Hesperotettix viridis	HEVI	1	0	0	0	0	0	0	0	0	0	0	0	0	0	0	0	0	0	0	1	0	0	0	0	0	0	8	2	0	0	0	0	0	0	0	0	0	0	0	1	0	0	0	0	0	0	0	0
Hippopedon capito	HICA	0	0	0	0	0	0	1	2	0	0	0	0	0	0	0	0	0	0	0	0	0	0	5	11	0	0	0	0	0	0	0	0	0	0	0	0	0	0	0	0	0	0	2	2	0	0	0	0
Hypochlora alba	HYAL	0	0	0	2	0	0	0	0	0	0	0	0	0	0	0	0	0	0	1	11	0	0	0	0	0	0	0	1	0	0	0	0	0	0	0	0	0	0	0	0	0	0	0	0	0	0	0	0
Lactista azteca	LAAZ	0	0	0	0	0	1	0	7	0	0	0	0	0	0	0	0	0	0	0	0	0	0	8	16	0	0	0	0	0	0	0	0	0	0	0	0	0	0	0	0	0	0	0	2	0	0	0	0
Leprus wheeleri	LEWH	0	0	0	0	0	0	1	2	0	0	0	0	0	0	0	0	0	0	0	0	0	0	0	2	0	0	0	0	0	0	0	0	0	0	0	0	0	0	0	0	0	0	0	0	0	0	0	0
Ligurotettix planum	LIPL	0	0	0	0	0	0	2	2	0	0	1	1	0	0	0	0	0	0	0	0	0	0	0	1	0	0	0	0	0	0	0	0	0	0	0	0	0	0	0	0	0	0	3	5	0	0	0	0
Melanoplus aridus	MEAR	0	0	0	0	0	0	9	6	0	0	2	1	0	0	0	0	0	0	0	1	0	0	7	6	0	0	2	7	0	0	5	2	0	0	0	0	0	0	0	0	0	0	0	0	0	0	3	3
Melanoplus arizonae	MEAZ	0	0	0	0	0	0	0	0	0	0	0	1	0	0	4	35	0	0	3	1	0	0	0	0	0	0	0	5	0	0	1	1	0	0	10	1	0	0	0	0	0	0	0	0	0	0	1	0
Melanoplus bowditchi	MEBO	0	0	0	0	0	0	0	0	0	0	0	0	0	0	0	0	0	0	0	0	0	0	0	0	0	0	0	0	0	0	3	0	0	0	0	0	0	0	0	0	0	0	0	0	0	0	0	0
Melanopulus flavidus	MEFL	38	39	18	23	0	0	0	0	0	0	0	0	0	0	0	0	140	216	14	29	0	0	0	0	0	0	0	0	0	0	0	0	0	0	0	0	0	7	3	8	0	0	0	0	0	0	0	1
Melanoplus gladstoni	MEGL	0	0	0	0	0	0	0	0	0	0	0	0	0	0	0	12	0	0	0	0	0	0	0	0	0	0	1	5	0	0	0	0	0	0	8	27	0	0	0	0	0	0	0	0	0	0	0	0
Melanoplus lakinus	MELA	0	0	0	2	0	0	0	1	0	0	0	0	0	0	0	2	0	0	0	0	0	0	0	0	0	0	0	0	0	0	0	0	0	0	0	11	0	0	0	0	0	0	0	0	0	0	0	0
Melanoplus occidentalis	MEOC	0	0	0	0	0	0	0	0	0	0	0	0	0	0	6	16	0	0	0	0	0	0	0	0	0	0	0	0	0	0	0	0	0	0	0	7	0	0	0	0	0	0	0	0	0	0	0	0
Mermeria texana	METE	0	0	0	0	0	0	0	0	0	0	0	0	0	0	0	0	0	0	0	0	0	0	0	0	0	0	0	0	0	0	0	1	0	0	0	0	0	0	0	0	0	0	0	0	0	0	0	0
Opeia obscura	OPOB	0	0	0	0	0	0	0	0	0	0	0	2	0	0	0	1	0	0	0	0	0	0	0	0	0	0	3	21	0	0	0	0	0	0	0	0	0	0	0	0	0	0	0	0	0	0	0	2
Paropomala pallida	PAPA	0	3	0	6	1	11	0	10	7	28	1	15	0	20	0	11	0	7	3	20	0	0	5	15	6	109	14	89	10	7	36	17	0	0	1	39	1	3	0	7	0	1	0	0	2	123	2	51
Phlibostroma quadrimaculatum	PHQU	0	0	0	0	0	0	0	0	0	0	0	0	0	0	0	0	0	0	0	0	0	0	0	0	0	0	0	0	0	0	0	0	0	0	0	3	0	0	0	0	0	0	0	0	0	0	4	2
Phrynotettix robustus	PHRO	0	0	0	0	1	1	4	2	1	0	0	0	0	0	0	0	0	0	0	0	0	4	0	4	0	0	0	0	0	0	0	0	0	0	0	0	0	0	0	0	0	1	0	0	0	0	0	0
Psoloessa delicatula	PSDE	8	6	2	2	0	0	9	6	108	56	0	0	189	156	12	18	4	2	1	0	9	3	0	2	31	9	0	0	0	3	0	0	157	121	60	63	10	18	0	0	0	0	0	0	58	41	66	49
Psoloessa texana	PSTE	0	0	0	0	22	37	0	0	0	0	0	0	0	0	0	0	0	2	0	0	3	11	0	2	0	0	0	0	11	15	0	0	0	0	0	0	0	0	0	0	15	25	0	0	0	0	0	0
Schistocerca nitens	SCNI	0	0	0	0	0	0	0	0	0	0	0	0	0	0	0	0	0	0	0	0	0	0	0	0	0	0	0	0	0	0	0	0	0	0	0	0	0	0	0	0	0	0	0	0	0	0	0	0
Syrbula montezuma	SYMO	0	0	0	0	0	0	0	0	0	0	0	4	0	0	0	1	0	0	0	0	0	0	0	0	0	0	0	2	0	0	0	0	0	0	0	0	0	0	0	0	0	0	0	0	0	0	0	0
Trimerotropis californicus	TRCA	0	0	0	1	0	0	4	10	0	0	0	0	0	0	0	0	0	0	0	0	0	0	24	17	0	0	0	0	0	0	4	0	0	0	0	0	0	0	0	0	0	0	1	4	0	0	0	0
Tropidolophus formosus	TRFO	0	0	0	5	0	0	0	0	0	0	0	0	0	0	0	2	0	0	0	1	0	0	0	0	0	0	0	0	0	0	0	0	0	0	0	0	0	0	0	1	0	0	0	0	0	0	0	0
Trimerotropis sp. nov.	TRGY	0	0	0	0	0	0	0	0	0	0	0	0	0	0	0	0	0	0	0	0	0	0	0	0	0	0	0	0	1	2	10	11	0	0	0	0	0	0	0	0	0	0	0	0	0	0	0	0
Trachyrhachis kiowa	TRKI	0	0	0	0	0	0	0	0	0	0	15	1	0	0	1	5	0	0	0	0	0	0	0	0	0	0	3	8	0	0	0	0	0	0	1	3	0	0	0	0	0	0	0	0	0	0	7	2
Trimerotropis pallidipennis	TRPA	12	15	2	3	8	12	6	6	10	2	7	0	8	5	13	5	1	2	14	3	6	7	23	33	6	4	14	3	8	6	20	19	2	2	39	29	1	2	3	2	8	10	9	10	2	1	5	1
Trimerotropis pistrinaria	TRPI	0	0	0	0	0	0	0	0	0	0	0	0	0	0	0	0	0	0	0	0	0	0	0	0	0	0	0	0	0	0	0	0	0	0	0	0	0	0	0	0	0	0	0	0	0	0	0	0
Xanthippus corallipes	XACO	2	3	0	0	0	0	0	0	5	0	0	0	66	36	4	3	1	0	0	0	0	0	0	0	0	0	0	0	0	0	0	0	34	18	2	2	0	0	0	0	0	0	0	0	0	0	0	0
Xanthippus montanus	XAMO	0	0	0	0	0	0	0	0	0	0	0	0	0	0	0	0	0	0	0	0	0	0	0	0	0	0	0	0	0	0	0	0	0	0	0	0	0	3	0	0	0	0	0	0	0	0	0	0
[truncated: 48 more columns]
